# 1 **Chrysomycin A inhibits the topoisomerase I of *Mycobacterium tuberculosis*.**

2 Balaji Muralikrishnan<sup>1</sup>, Lekshmi K. Edison<sup>1</sup>, Azger Dusthacker<sup>2</sup>, Jijimole G R<sup>1</sup>, Ranjit  
3 Ramachandran<sup>1</sup>, Aravind Madhavan<sup>1</sup>, Ajay Kumar Ramakrishnan<sup>1\*</sup>.

4 <sup>1</sup>Mycobacterium Research Laboratory, Rajiv Gandhi Centre for Biotechnology,  
5 Thiruvananthapuram, Kerala, India.

6 <sup>2</sup>Department of Bacteriology, National Institute for Research in Tuberculosis, Chennai, Tamil  
7 Nadu, India.

8 \*Corresponding author. Email id: [rakumar@rgcb.res.in](mailto:rakumar@rgcb.res.in)

## 9 **Abstract**

10 Novel anti-tuberculosis drugs are essential to manage drug resistant tuberculosis, caused by the  
11 notorious pathogen *Mycobacterium tuberculosis*. We recently reported the antimycobacterial  
12 activity of chrysomycin A in vitro and in infected macrophages. In this study, we report that the  
13 molecule inhibits the growth of drug resistant clinical strains of *Mycobacterium tuberculosis* and  
14 acts in synergy with anti-TB drugs such as ethambutol, ciprofloxacin and novobiocin. In pursuit  
15 of its mechanism of action, it was found that chrysomycin A renders bactericidal activity by  
16 interacting with DNA at specific sequences and by inhibiting topoisomerase I activity of  
17 *Mycobacterium tuberculosis*. It also exhibits weak inhibition of gyrase enzyme of the pathogen.

## 18 **Introduction**

19 Chrysomycin A was first discovered by Strelitz et al., in 1955 when screening extracts of  
20 actinomycetes against bacteriophages <sup>1</sup>. Although it was discovered in the golden era of  
21 antibiotic discovery, it remained non-available. A few studies have reported its anti-  
22 tumorigenic nature <sup>2-4</sup>. Acetylated forms of chrysomycins were also reported for the same activity  
23 <sup>5</sup>. However, our laboratory was the first one to report chrysomycin A's anti-*Mycobacterium*  
24 *tuberculosis* property. In our drug screening program against *M. tuberculosis*, we chanced upon  
25 chrysomycin A from a novel *Streptomyces* sp <sup>6</sup>. It has bactericidal activity on both planktonic as  
26 well as phagocytosed bacteria. Subsequently in an independent study, derivatives of  
27 chrysomycin A have been reported for strong growth inhibitory activity against drug resistant *M.*  
28 *tuberculosis* <sup>7</sup>. Structurally, chrysomycin A is a naphthocoumarin and has a planar structure and

29 this led us to speculate about its interaction with DNA<sup>8, 9</sup>. Identification of the target of  
30 chrysomycin A in *M. tuberculosis* is essential to understand its mechanism of action which  
31 ultimately could lead to rational design of potent molecules from its chemical backbone.

32 This study focuses on identifying the target of chrysomycin A in *M. tuberculosis*. Towards this,  
33 we tested the molecule on various drug resistant clinical strains of *M. tuberculosis* to draw initial  
34 cues from the drug resistance pattern. Subsequently, DNA interaction studies were carried out  
35 using physico-chemical methods and molecular docking analysis. The results were suggestive of  
36 inhibition of topoisomerases and to check this possibility, functional inhibition assays were  
37 performed and support was drawn from molecular docking analysis.

## 38 **Materials and Methods**

### 39 **Bacterial strains, cell lines, chemicals and general procedures**

40 *M. tuberculosis* H37Rv was grown on Middlebrook 7H9 medium (BD Difco, New Jersey)  
41 supplemented with 10% Oleic acid-Albumin-Dextrose-Catalase (OADC, Difco). The details of  
42 the drug resistant clinical strains of *M. tuberculosis* are provided in the Table 1. Middlebrook  
43 7H10 solid medium was procured from BD Difco, while flat opti bottom 96 well plates were  
44 from ThermoFisher Scientific, Massachusetts, United States. *M. tuberculosis* gyrase and  
45 topoisomerase I inhibition kits were bought from Inspiralis (Norwich, UK). Potassium iodide,  
46 Sodium chloride and oligonucleotides (listed in supplementary table 2) were procured from  
47 Sigma (India)

### 48 **Antimicrobial activity of chrysomycin A on drug resistant clinical strains of *M. tuberculosis***

49 Chrysomycin A was tested on drug resistant clinical strains of *M. tuberculosis*. For this, well  
50 characterized mono-drug resistant, multidrug resistant and extensively drug resistant strains were  
51 used and micro-dilution assay was performed on each (1-16 µg/mL). After incubating the culture  
52 at 37 °C for 24 h, 5 µL of the treated and control cultures were spotted onto Middlebrook 7H10  
53 solid medium. The lowest concentration at which no colonies appeared was considered as the  
54 MIC.

### 55 **Study of synergism with anti-TB drugs**

56 To check whether chryso mycin A can interact with some of the current anti-TB drugs, checker  
57 board assay was performed as described <sup>10</sup>. Surrogate organism, *Mycobacterium smegmatis*, was  
58 used for this particular experiment. First-line drugs, isoniazid, rifampicin and ethambutol were  
59 included in the study along with ciprofloxacin and novobiocin. Pyrazinamide, a first-line drug  
60 was not included in the study as the drug is not active against *M. smegmatis*. In the checker board  
61 assay, synergy between chryso mycin A and the first-line drugs in eliciting antimicrobial property  
62 was determined individually. Briefly, as shown in Figure S2A, in a 96 well plate, chryso mycin  
63 A was serially diluted (6 µg/mL to 1/16 µg/mL) in horizontal direction from left to right until the  
64 penultimate column and leaving the wells in the last column without chryso mycin A. Next, the  
65 second line drug (ciprofloxacin, as shown in Figure 32A) is serially diluted (1 µg/mL to 1/16  
66 µg/mL) in the vertical direction from top to bottom until the penultimate row leaving the last row  
67 without ciprofloxacin. Thus, the last row and the last column will indicate the individual MIC of  
68 chryso mycin A and ciprofloxacin, respectively. The test organism, *M. smegmatis* (1.5 X 10<sup>6</sup>  
69 bacteria) was inoculated and resazurin microtitre assay was performed as described <sup>11</sup>. The wells  
70 between the last row and last column of the 96 well plate bear the different combinations of both  
71 the drugs.

## 72 **Fluorescence spectrometry**

73 The experiment was performed as described by Rehman et al <sup>12</sup> with minor changes. Briefly, flat  
74 opti-bottom Nunc 96 well plates were used instead of cuvettes. Chryso mycin A (5 or 50 µM)  
75 was kept at constant concentration and its intrinsic fluorescence was read between 400 and 600  
76 nm when excited at 280 nm. Increasing concentrations (0-50µM) of calf thymus DNA or short  
77 stretches of single/double stranded DNA were added to this, and the change in fluorescence  
78 spectrum was monitored. The spectra were read using JASCON fluorometer and the graph was  
79 plotted using Graphpad Prism version 7 Software. Stern-Volmer quenching constant was  
80 calculated from the slope of [F/F<sub>0</sub>] vs [DNA] plot. F<sub>0</sub> is the initial fluorescence before adding  
81 potassium iodide and F is the fluorescence obtained after addition, while [DNA] is the  
82 concentration of DNA. The constant was compared to that of reported intercalators and groove  
83 binders <sup>13</sup>.

## 84 **Effect of potassium iodide and sodium chloride on the fluorescence of DNA-chryso mycinA** 85 **complex**

86 Potassium iodide quenching was carried out as described by Sadeghi et al <sup>14</sup>. Briefly, potassium  
87 iodide (0–8 mM) was added to chryso mycin A (50  $\mu$ M) and DNA-chryso mycin complex (10  $\mu$ M  
88 of double stranded DNA with 50  $\mu$ M of chryso mycin A). The total reaction volume was 200  $\mu$ L.  
89 After exciting at 280 nm, the fluorescence emission spectra were recorded between 400 to 600  
90 nm. A graph was plotted with the ratios of F and F<sub>0</sub> against increasing concentrations of  
91 potassium iodide. The effect of ionic strength was studied by varying the concentration of  
92 sodium chloride between 0 and 70 mM in a total volume of 200  $\mu$ L containing 50  $\mu$ M  
93 chryso mycin A or calf thymus DNA-chryso mycin A complex (1:1). The change in spectrum was  
94 recorded at 505 nm and a graph was plotted against increasing concentrations of sodium  
95 chloride.

#### 96 **Circular dichroism (CD)**

97 CD spectra were recorded from 200 nm to 320 nm with a scan speed of 200 nm/min with a  
98 spectral bandwidth of 10 nm using a JASCON CD spectrophotometer (Maryland, USA). Three  
99 scans were averaged to plot the spectra. Concentration of single/double stranded/calf thymus  
100 DNA was kept constant at 50  $\mu$ M and its spectrum was read between 220 and 300 nm.  
101 Increasing concentrations of chryso mycin A (0-220 $\mu$ M) were added to DNA and the change in  
102 CD spectra was recorded, and the graph was plotted using Graphpad prism version 7 software.  
103 The spectra of buffer solution (5mMTris-HCl, pH 8.0) containing chryso mycin A at appropriate  
104 concentrations were subtracted from the spectra of DNA and chryso mycin A-DNA complex.

#### 105 **Interaction of chryso mycin A with single/double stranded oligonucleotides**

106 Antibiotics and drugs with antimicrobial activity that have preferences for DNA sequences were  
107 identified from published literature <sup>15, 16</sup>, and a random set of oligonucleotides was synthesized as  
108 short stretches (single stranded) and were used in fluorescence spectrometry as described earlier  
109 (section 5.1.1). The most preferred sequences were identified based on the highest fluorescence  
110 read out. After identifying these sequences, short oligos of DNA sequences were synthesized and  
111 ligated to prepare double stranded DNA, and were used in the fluorescence spectrometry and  
112 circular dichroism studies.

#### 113 **Molecular docking analysis**

114 Protein structures, 5D5H (*M. tuberculosis* topoisomerase I), 5BTD (*M. tuberculosis* gyrase); and  
115 DNA structures, IBNA (dodecamer without ACGT site) and IHQ7 (with ACGT site) were  
116 retrieved from PDB (protein data bank) database in PDB format. The ligands attached with the  
117 protein were removed using PrepWizard software in Schrodinger suites 2019-1. Energy  
118 minimization was carried out along with optimizations such as building missing loops and  
119 removal of water molecules. SiteMap was used to predict the ligand binding sites and the  
120 catalytic domain was selected. Two dimensional structure of chrysomycin A (CID 73468) was  
121 retrieved from PubChem database and imported to LigPrep software of the suite and energy  
122 minimizations were performed. Finally, with the default setting of 15Å X 15Å X 15Å grid  
123 points, a grid was generated. This was used in the docking analysis using Glide dock-XP mode  
124 (extra precision).

### 125 **Mobility shift assay**

126 To 200 ng of plasmid DNA (pBR322), chrysomycin A was added at different concentrations (0 –  
127 10 µM) and allowed to interact. From each of these reactions, 10 µL of the mix was run on a 1%  
128 agarose gel (prepared in 1X Tris acetate buffer, pH 8.0) for 60 min at 50 V/cm in 1X Tris acetate  
129 buffer containing ethidium bromide. The DNA band pattern was documented using Bio-Rad gel  
130 documentation system.

### 131 **Scanning electron microscopy**

132 Fifty microliter of *M. tuberculosis* H37Rv culture (of McFarland standard 1.0 treated with  
133 chrysomycin A at 1X MIC overnight, and untreated control) was centrifuged at 8000 g for 10  
134 min at 25 °C. The resulting pellet was washed with ice-cold 1X PBS and suspended in 1.0 mL of  
135 Dubos Difco broth. Two hundred microliter of this suspension was loaded onto polylysine-  
136 coated cover slips that were prepared according to manufacturer's protocol (Sigma-Aldrich). The  
137 bacteria were allowed to settle on the cover slip for 30 min. Then, the culture was decanted  
138 gently and 2.5% glutaraldehyde in PBS (pH 7.4) was added to the coverslip. This was incubated  
139 overnight at 4 °C and then subjected to dehydration with a series of ethanol concentrations (50%,  
140 70%, 90% and 100%). At each step of ethanol gradient treatment, 10 min of incubation was  
141 provided for effective dehydration. The coverslips were dried at room temperature and the

142 samples were gold-sputtered using JEOL-1200 (Peabody, MA, USA) and imaged using a JEOL-  
143 JSM-5600 LV (USA) scanning electron microscope.

#### 144 ***M. tuberculosis* topoisomerase I inhibition assay**

145 *M. tuberculosis* topoisomerase I enzyme was procured from Inspiralis, UK. Supercoiled pUC19  
146 plasmid was isolated using either a plasmid maxiprep kit (Magerey Nagel) or using a modified  
147 method described by Carbone et al. 2012 using miniprep kit (Magerey Nagel). Two units of the  
148 enzyme were used in each reaction to relax the supercoiled DNA in the presence of different  
149 concentrations of chrysomycinA (10, 20, 40 and 80  $\mu\text{M}$ ). Experimental procedures were  
150 followed as per the protocol provided by the manufacturer.

#### 151 ***M. tuberculosis* gyrase inhibition assay**

152 *M. tuberculosis* gyrase enzyme was purchased from Inspiralis, UK. In decatenation assay  
153 kinetoplast DNA served as the substrate (every reaction had 200 ng of DNA). Chrysomycin A at  
154 different concentrations (5, 50 and 100  $\mu\text{M}$ ) was used to inhibit the enzyme function.  
155 Supercoiling assay had relaxed topoisomers of pBR322 plasmid (provided in the kit) as  
156 substrate, and the assay was carried out in the presence of ATP (1 mM). Chrysomycin A (5, 50  
157 and 100  $\mu\text{M}$ ) was used to inhibit the enzyme function. For DNA relaxation assay, pUC19  
158 supercoiled plasmid (300 ng) was used as the substrate and the assay was performed without  
159 ATP in the reaction. Ciprofloxacin at 25  $\mu\text{M}$  and novobiocin at 20  $\mu\text{M}$  served as positive control  
160 for inhibition. Chrysomycin A at different concentrations (0-80  $\mu\text{M}$ ) was used to inhibit the  
161 enzyme functions. In all reactions, except in the negative controls, 2 units of the enzyme was  
162 used in the decatenation, supercoiling and relaxation assays. All procedures were followed as per  
163 the protocol provided by the manufacturer.

## 164 **Results and Discussion**

### 165 **Activity of chrysomycin A against drug resistant clinical strains of *M. tuberculosis***

166 The antimicrobial activity of chrysomycin A was tested on *M. tuberculosis* strains that were  
167 resistant to different drugs and we tested if there is any change in their minimum inhibitory  
168 concentrations (MIC). Interestingly, more than 70% of the drug resistant strains recruited were  
169 inhibited at the same concentration of chrysomycin A at which it inhibited the susceptible

170 virulent laboratory strain *M. tuberculosis* H37Rv. The remaining strains were inhibited at slightly  
171 higher concentrations. The details of the strains, their susceptibility to anti-TB drugs and the  
172 MIC observed in the case of chrysomycinA are provided in Table 1. Strains 2-5 were resistant to  
173 isoniazid, rifampicin and levofloxacin while susceptible to kanamycin. However, chrysomycin A  
174 elicited bactericidal activity on these strains below its MIC which was observed on *M.*  
175 *tuberculosis* H37Rv. Strain 1 was similar to Strains 2-5 except that it was resistant to kanamycin  
176 also. It was killed by chrysomycin A at the same MIC that killed *M. tuberculosis* H37Rv. On the  
177 whole, chrysomycin A seemed to be very effective against MDR strains while it was less  
178 effective on ofloxacin resistant strains suggesting that the molecule could act on topoisomerases.

### 179 **Chrysomycin A exhibits synergistic activity with anti-tuberculosis drugs**

180 To validate the observation on drug resistant strains of *M. tuberculosis*, chrysomycin A was  
181 tested along with first-line and second-line anti-TB drugs and checked for their efficacy on  
182 bacterial killing. *M. smegmatis* mc<sup>2</sup>155, the surrogate mycobacterium, was treated with  
183 chrysomycin A in combination with the first-line drugs rifampicin, isoniazid, ethambutol and  
184 second-line drug ciprofloxacin and novobiocin. Figure S2 summarizes the result; briefly,  
185 chrysomycin A acts synergistically with ethambutol, ciprofloxacin and novobiocin while it also  
186 shows additive property in exerting antimicrobial activity in combination with rifampicin and  
187 isoniazid. Chrysomycin A belongs to coumarin class of antibiotics which are known to bind  
188 gyrase subunit B and inhibit the enzyme function. Interestingly, while acting in synergy the  
189 amount of chrysomycin A and the combination drugs could be reduced by 4 fold to effect the  
190 same level of killing. Thus, it seems chrysomycin A could be inhibiting the topoisomerases along  
191 with ciprofloxacin and novobiocin. Chrysomycin A showed synergism when treated along with  
192 ethambutol, and it could be because the molecule might have secondary targets in the bacterium.  
193 Isoniazid and ethambutol are known to act synergistically and are required only at half their  
194 original MIC to cause bacterial killing <sup>17</sup>. However, in combination with chrysomycin A, only  
195 one fourth the concentration is required to elicit the same bactericidal activity. Pyrazinamide was  
196 not included in the study because it does not inhibit the growth of *M. smegmatis* <sup>18</sup>.

### 197 **Chrysomycin A – DNA interaction**

#### 198 **Chrysomycin A intercalates DNA at specific sequences**



199 The planar structure of chrysomycin A (Figure S3) and the speculation on its ability to bind  
200 DNA warranted DNA interaction studies. The intrinsic fluorescence of chrysomycin A facilitated  
201 the drug-DNA interaction studies through the analysis of alterations in the intrinsic fluorescence  
202 after forming drug-DNA complex. Chrysomycin A emits fluorescence at 505 nm in TE buffer,  
203 (pH 8.0) when excited at 280 nm or 400 nm. Making use of this property, the change in its  
204 fluorescence was monitored with addition of increasing concentrations of calf thymus DNA to a  
205 constant amount of chrysomycin A. We observed a concentration-dependent increase in  
206 fluorescence of chrysomycin A on addition of calf thymus DNA (Figure1A). Also, a red shift (5  
207 nm) was observed in the fluorescence emission after addition of DNA which indicated a complex  
208 formation. The shift also shows that chrysomycin A is buried deep inside the hydrophobic DNA  
209 helix which prevents its interaction with water molecules. This phenomenon was described by  
210 Sirajuddin et al with other intercalating drugs <sup>19</sup>. The ratio of observed to initial fluorescence was  
211 plotted against the respective concentration of DNA and a Stern-Volmer constant (K<sub>sv</sub>) of 1.2 X  
212 10<sup>4</sup> M<sup>-1</sup> was obtained from the slope of the graph (Figure 1B). The constant obtained matches  
213 neither with the lower values of groove binders nor in the higher constants of canonical  
214 intercalators (K<sub>sv</sub><10<sup>4</sup> if it is a groove binder, K<sub>sv</sub>>10<sup>5</sup> in the case of intercalators) demanding a  
215 quenching experiment to draw insights into the binding. Therefore to validate the mode of  
216 binding, potassium iodide was introduced to quench the fluorescence of unbound and DNA-  
217 bound chrysomycin A. Contrary to our expectation, on addition of potassium iodide we observed  
218 an increase in fluorescence even from unbound chrysomycin A and the DNA-chrysomycin A  
219 complex. A graph was plotted using the F/F<sub>0</sub> ratios versus the concentration of potassium iodide  
220 added (Figure1C). A slope was calculated for both the linear graphs and it was found that the  
221 difference in the K<sub>sv</sub> (Stern-Volmer constant) was larger indicating that the interaction could be  
222 through intercalation. To rule out the possibility of it being a groove binder, increasing  
223 concentrations of sodium chloride was added to the DNA and DNA-chrysomycin A complex to  
224 increase the ionic strength of the solution which would result in the removal of surface bound  
225 molecules and consequently reduce fluorescence intensity. As expected, the fluorescence  
226 intensity remained largely unaffected even after the addition of high concentrations of sodium  
227 chloride (Figure1D). Further, circular dichroism spectrometry was performed to find  
228 chrysomycin A-induced alterations in the secondary structure of DNA. A negative band around  
229 245 nm and positive band around 275 nm are characteristic of B form of DNA (calf thymus



230 DNA). Alteration in the negative band would indicate a change in helicity, and alterations in the  
231 positive band would indicate perturbation of the stacks in the DNA<sup>20</sup>. On treatment with  
232 chrysomycin A, the negative band at 245 nm was altered which pointed out at a change in  
233 helicity which in turn supported intercalation (Figure 1E). The positive band was disturbed only  
234 when very high concentrations of chrysomycin A were added. In addition, to understand whether  
235 the molecule could affect supercoiled form of DNA, pUC19 plasmid was treated with  
236 chrysomycin A and electrophoresed on an agarose gel. As expected, the supercoiled form of  
237 DNA band migrated slowly with increasing concentrations of chrysomycin A (Figure S1). This  
238 shift in mobility was also observed by TT Wei et al<sup>9</sup> who studied interaction of intercalators with  
239 plasmid DNA. Furthermore, through molecular docking, chrysomycin A was found to intercalate  
240 through minor groove (Figure 1F).

241 Therefore, the above evidences confirm that chrysomycin A intercalates DNA with low Stern –  
242 Volmer constant (K<sub>sv</sub>). This also leads to a hypothesis that the lower affinity observed might be  
243 due to chrysomycin A's preference for specific DNA sequences. By data mining the literature,  
244 we could identify such small molecules that bind specific DNA sequences, and they are listed in  
245 Supplementary Table 1. Some of those specific sequences were randomly chosen, synthesized  
246 and we performed fluorescence spectrometry with chrysomycin A (5 μM). A concentration-  
247 dependent increase in fluorescence was observed upon addition of increasing amounts of  
248 oligonucleotides, and a significant variation in fluorescence was observed based on the sequence  
249 of the oligonucleotides (Figure 2A). This varied fluorescence symbolizes preference for specific  
250 sequences. On comparing the sequences, it was found that a GC flanked by A and T appeared to  
251 be the most preferred sequence for binding of chrysomycin A. To validate this observation,  
252 double stranded DNA oligos with increasing number of AGCT and ACGT sites were  
253 synthesized and fluorescence spectroscopy analysis was carried out. As expected, there was an  
254 increase in fluorescence depending on the increasing number of AGCT/ACGT sites (Figure 2B  
255 and 2D). Change in the secondary structure was also monitored for each of these oligos through  
256 circular dichroism spectrometry (Figure 2C and 2E). A significant change was observed in the  
257 helicity (increasing negative band at 245 nm) only when there was a single AGCT/ACGT site.  
258 Also, oligos containing single ACGT was observed to be more vulnerable to chrysomycin A than  
259 those containing AGCT in terms of alterations in the DNA structure. However, this change was  
260 not observed in DNA with more than one AGCT/ACGT sites. This is presumed to be due to a

261 stabilization effect of saturated DNA–chrysoomycin A complex which does not allow any more  
262 change in the secondary structure. To confirm these results, molecular docking was performed  
263 with DNA sequences with and without the ACGT sites (1HQ7 and IBNA, respectively) (Figure  
264 3). Docking scores were ten-fold high (-5) in the case of binding to DNA with ACGT site  
265 compared to DNA without ACGT site. Also, chrysoomycin A intercalated through the major  
266 groove in ACGT-containing DNA compared to the minor groove intercalation with DNA lacking  
267 ACGT. Hoechst 33238 and ethidium bromide served as controls which have no sequence  
268 specificity for binding. Next, in pursuit of finding the significance of the ACGT/AGCT sites, we  
269 found an orphan ACGT site in the strong topoisomerase sites (STS) of topoisomerase I of *M.*  
270 *smegmatis* and *M. tuberculosis* <sup>21</sup>. Interestingly, we found that actinomycin D also exhibits  
271 sequence specific binding and binds preferentially to GC flanked by A and T regions of DNA <sup>16</sup>,  
272 <sup>22</sup> and, actinomycin D also restricts topoisomerase I activity in tumor cells <sup>23</sup>. Therefore we  
273 wished to test if chrysoomycin A also could possibly inhibit topoisomerases of *M. tuberculosis*.

#### 274 **Chrysoomycin A inhibits the activity of topoisomerases of *M. tuberculosis***

275 Ahmed et al. <sup>24</sup> observed that conditional knocking down of topoisomerase I in *M. tuberculosis*  
276 resulted in the bacterial shrinkage as well as de-compaction of the genetic materials. A  
277 comparable observation was made by Arjomandzadegan et al <sup>25</sup>, where a drug resistant strain of  
278 *M. tuberculosis* treated with ofloxacin (fluoroquinolone that inhibits gyrase enzyme activity)  
279 acquired a shrunken abnormal oval shape. Thus, it is evident that inhibition of topoisomerases  
280 results in the reduction of bacterial size. To find the effect of chrysoomycin A on *M. tuberculosis*  
281 morphology, the bacterium was treated with chrysoomycin A at its MIC for 12 h and subjected to  
282 scanning electron microscopy. We observed 5 to 10 fold reduction in the size of chrysoomycin A-  
283 treated bacteria when compared to the untreated control (Figure 4A and 4B). We also observed  
284 that small rod-shaped bacteria failed to grow further when we tried to retrieve them in an  
285 antibiotic-free growth medium. Altogether, the change in morphology hinted at a possible  
286 topoisomerase inhibition. In addition, chrysoomycin A belongs to coumarin class of antibiotics  
287 and coumarins are known for their anti-gyrase activity by binding to the ATP binding subunit B,  
288 and therefore we wondered if chrysoomycin A might inhibit the gyrase enzyme. Also, we have  
289 already shown that it can intercalate at specific sequences in DNA, and intercalators are well  
290 known inhibitors of topoisomerase enzymes.

291 We used Schrodinger docking software to check whether chrysomycin A can bind to *M.*  
292 *tuberculosis* topoisomerase I (PDB ID: 5D5H) and *M. tuberculosis* gyrase (PDB ID: 5BTD).  
293 Interestingly, chrysomycin A was found to interact with the primase domain of the  
294 topoisomerase I enzyme and the active site Tyr-342<sup>26</sup> was found to interact with the molecule  
295 (Figure 4C and 4D). We did not observe any such interaction in the docking study with the  
296 gyrase enzyme. Subsequently, a DNA relaxation assay was performed with *M. tuberculosis*  
297 topoisomerase I with (0-80  $\mu$ M) and without chrysomycin A. As expected a concentration-  
298 dependent inhibition of relaxation was observed (Figure 4E). At 20  $\mu$ M, chrysomycin A seemed  
299 to inhibit almost half of the enzyme activity. Furthermore, to the best of our knowledge this IC<sub>50</sub>  
300 value of 20  $\mu$ M seems to be the best among any natural molecule with the same activity. The  
301 molecule was also tested for inhibition of various functions of *M. tuberculosis* gyrase. The  
302 molecule could inhibit decatenation activity (5  $\mu$ M) efficiently but exhibited moderate to poor  
303 inhibition of the DNA supercoiling (50  $\mu$ M) and DNA relaxation activity (50  $\mu$ M) of the gyrase  
304 enzyme (Figure 5A, 5B and 5C). We speculate that the gyrase inhibition is through its DNA  
305 intercalation rather than through direct binding to the enzyme. Thus, these observations  
306 supported our hypothesis that chrysomycin A can inhibit both the topoisomerase I and gyrase  
307 enzymes of *M. tuberculosis*.

308

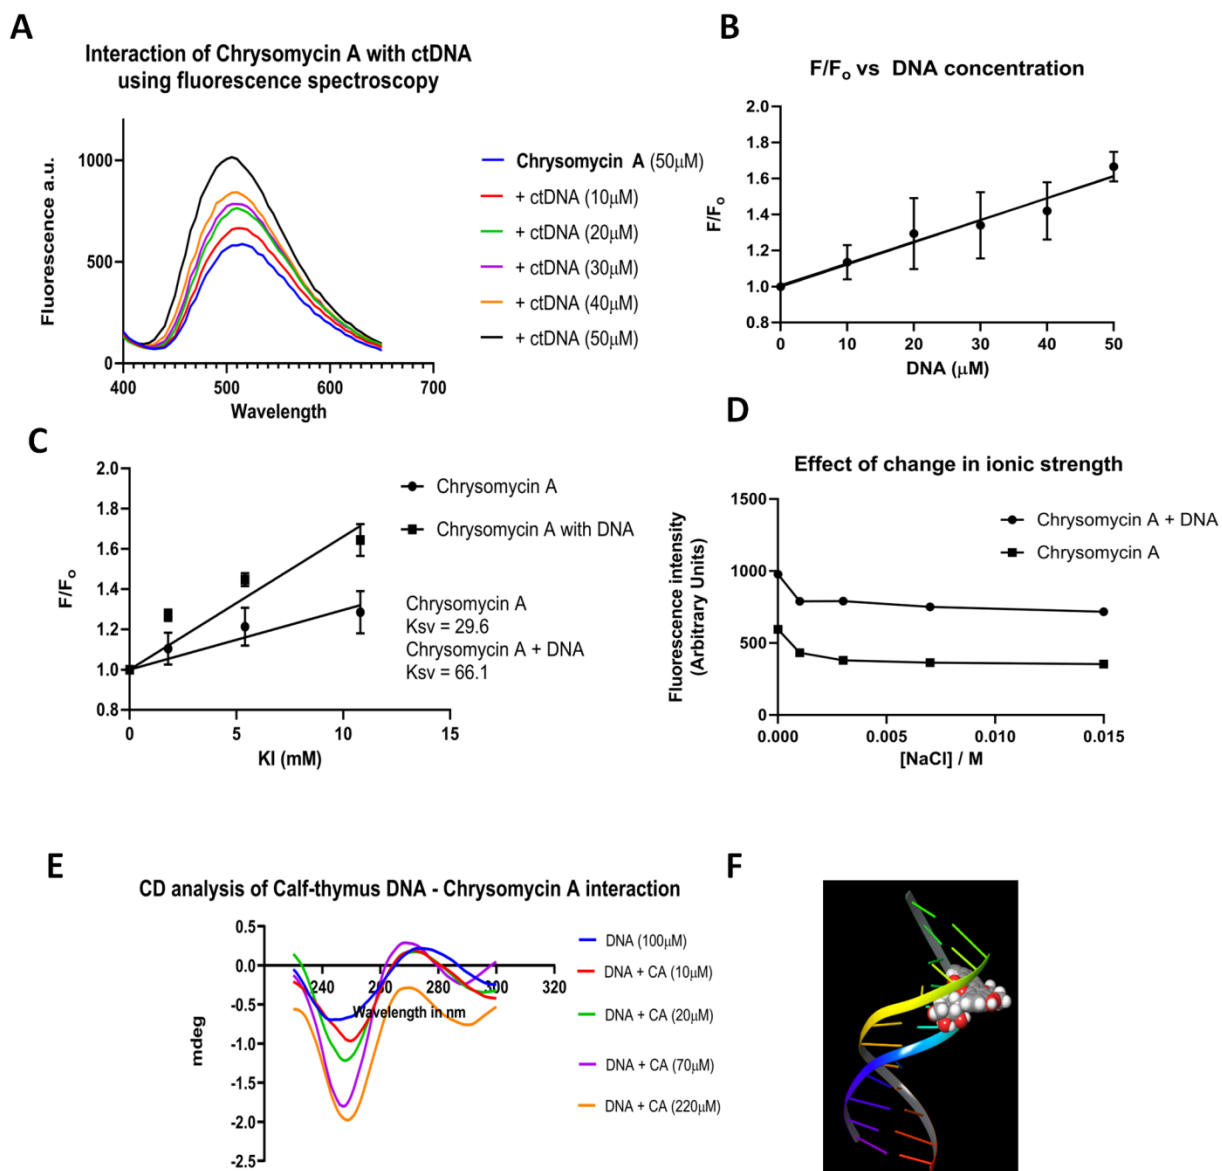

309

310 **Figure 1:** **A.** Change in fluorescence of chrysomycinA on addition of calf thymus DNA. **B.**  
 311 Determination of Stern-Volmer constant ( $K_{SV}$ ) for DNA-chrysomycin A complex. **C.**  
 312 Comparison of  $K_{SV}$  of free chrysomycin A and DNA-bound chrysomycin A, using potassium  
 313 iodide as the quencher. **D.** Effect of change in ionic strength on fluorescence of DNA-  
 314 chrysomycinA complex. **E.** Circular dichroism spectrometry of DNA-chrysomycinA complex.  
 315 **F.** Molecular docking analysis: chrysomycin A docked onto IBNA.

316

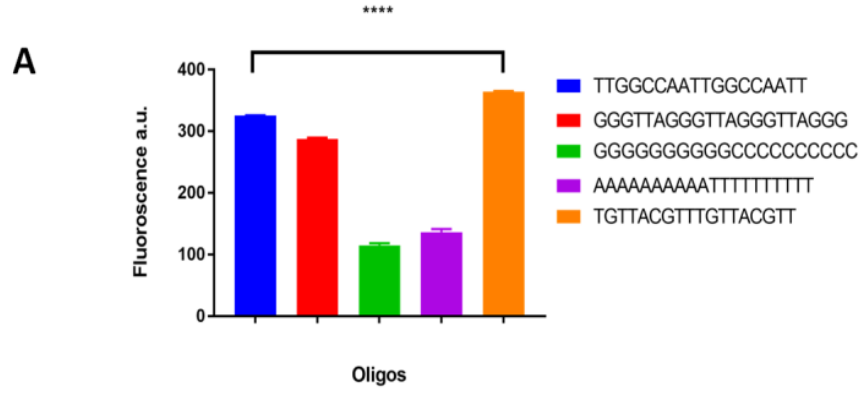

317

318

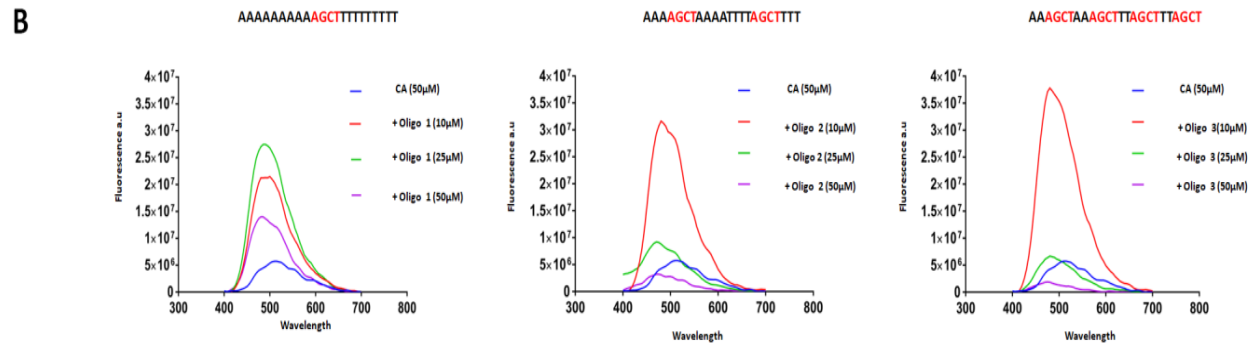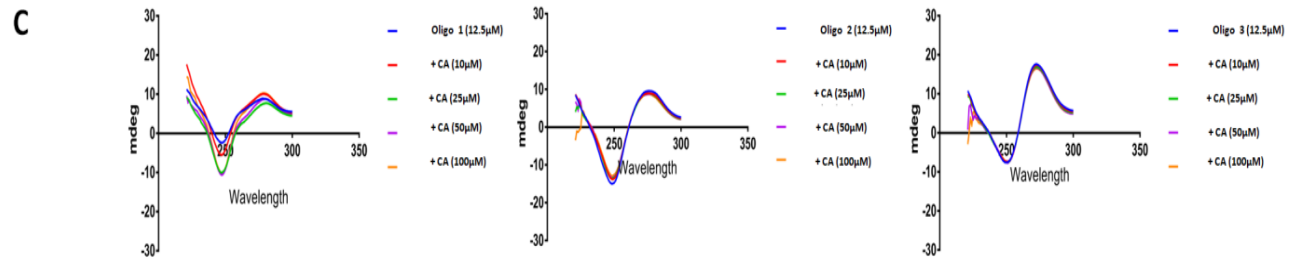

319

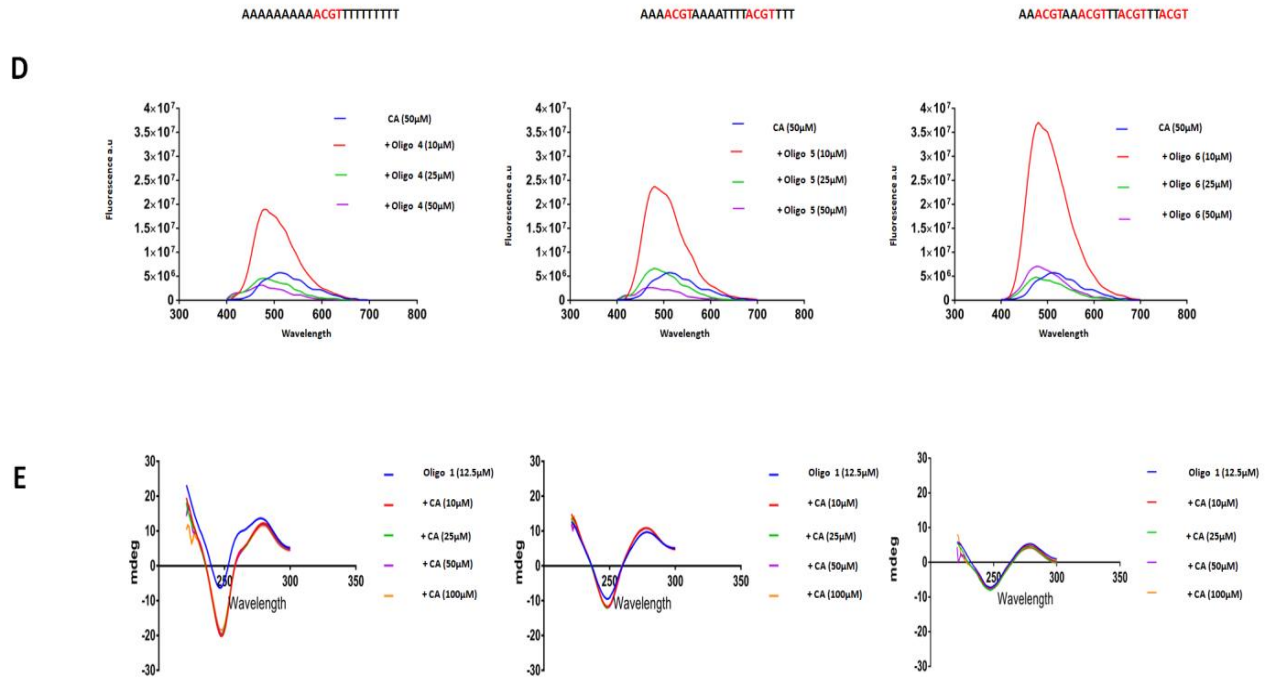

320

321

322 **Figure 2:** Chrysomycin A preferentially binds to specific nucleotide sequences. A. Fluorescence  
323 spectrometry shows differential fluorescence emission of chrysomycinA bound to different  
324 nucleotide sequences. B. Change in fluorescence with respect to the number of AGCT sites in  
325 the oligos. C. Circular dichroism spectrometry shows changes in the secondary structure of DNA  
326 bound to chrysomycin A with respect to the number of AGCT sites in the oligos. D. Change in  
327 fluorescence with respect to the number of ACGT sites in the oligos. E. Circular dichroism  
328 spectrometry shows changes in the secondary structure of DNA bound to chrysomycin A with  
329 respect to the number of ACGT sites in the oligos.

330

331

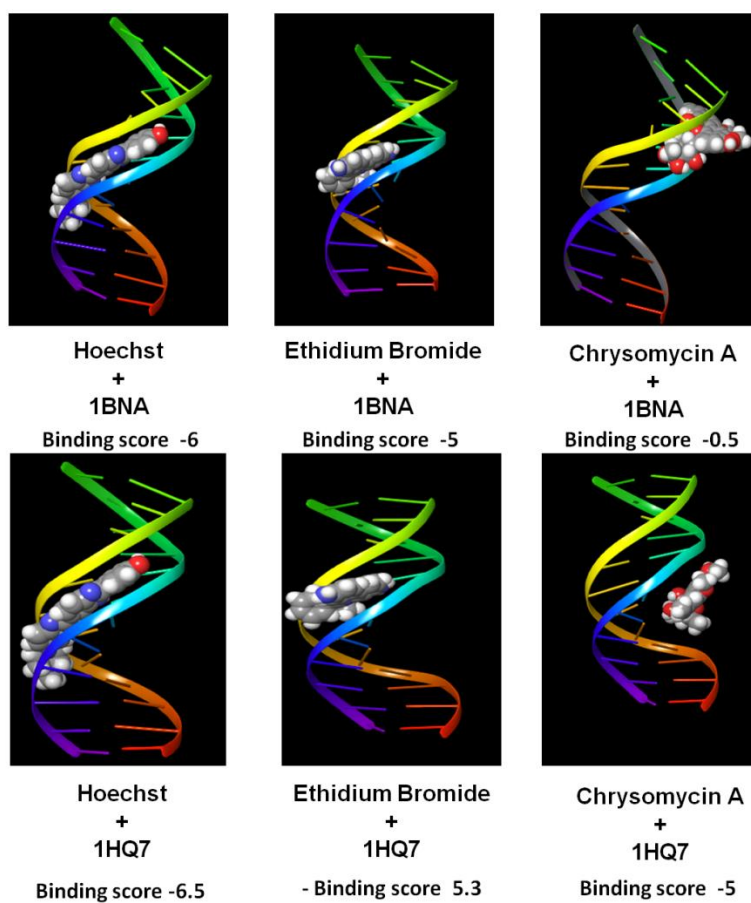

332

333 **Figure 3:** Molecular docking of chrysomycin A, ethidium bromide and Hoechst with DNA  
334 sequences with ACGT (1HQ7) and without ACGT (1BNA) site.

335

336



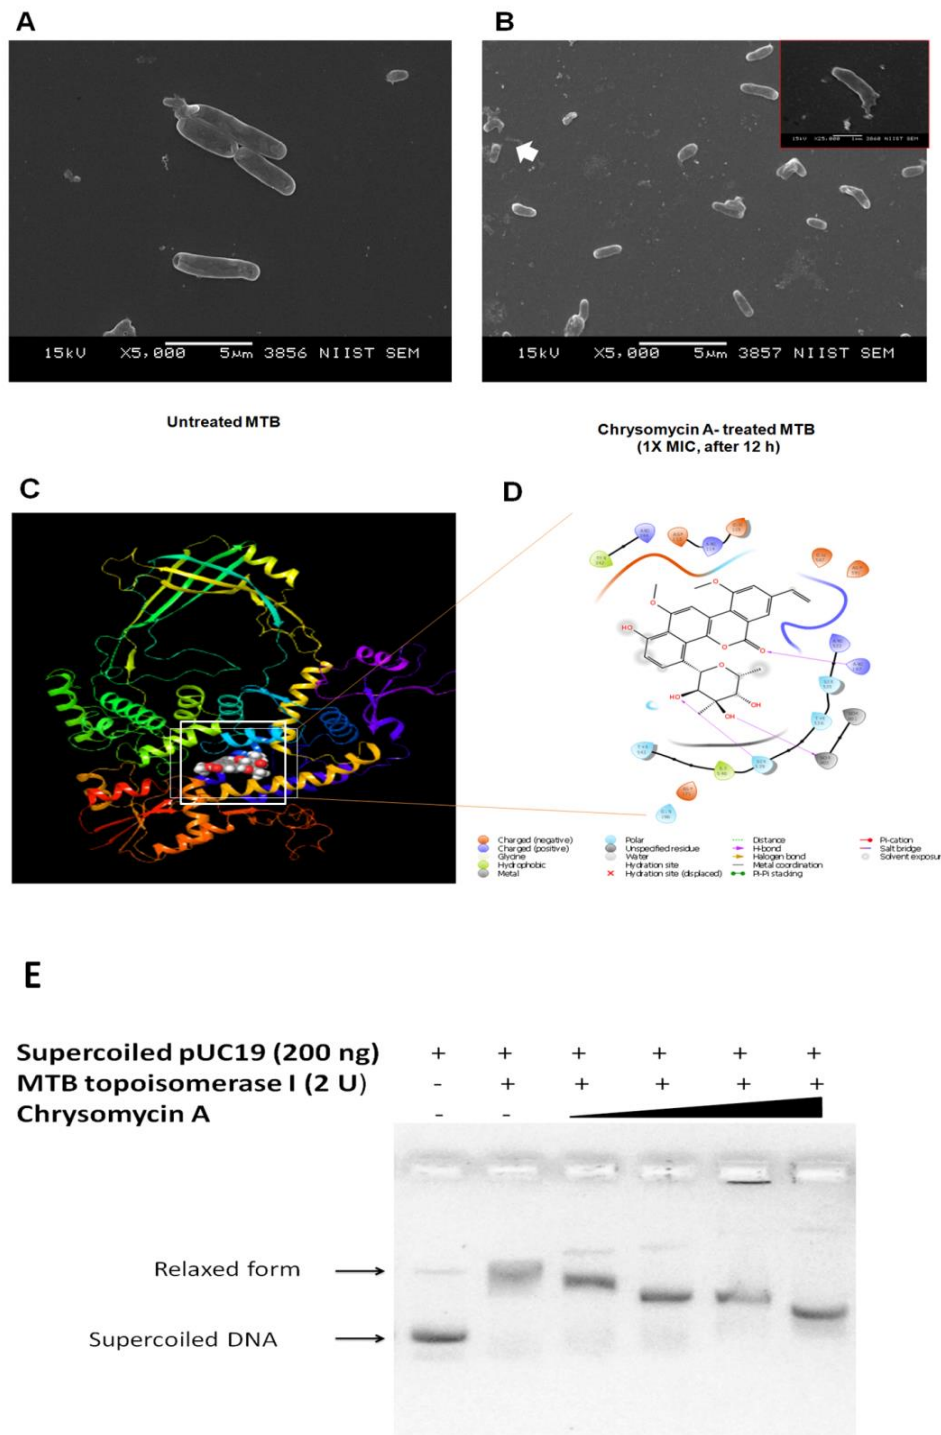

337

338 **Figure 4:** Chrysomycin A interacts with *M. tuberculosis* topoisomerase I to inhibit the growth of  
 339 the bacteria. A and B are SEM images of untreated and chrysomycin A-treated bacteria,  
 340 respectively. The inset image in B shows a broken leaky bacterium. C. Molecular docking of  
 341 chrysomycin A bound to *M. tuberculosis* topoisomerase I protein. D. The binding pocket of

342 chryso mycin A in the protein shows the interacting amino acids. E. DNA relaxation assay with  
 343 *M. tuberculosis* topoisomerase I and chryso mycin A.

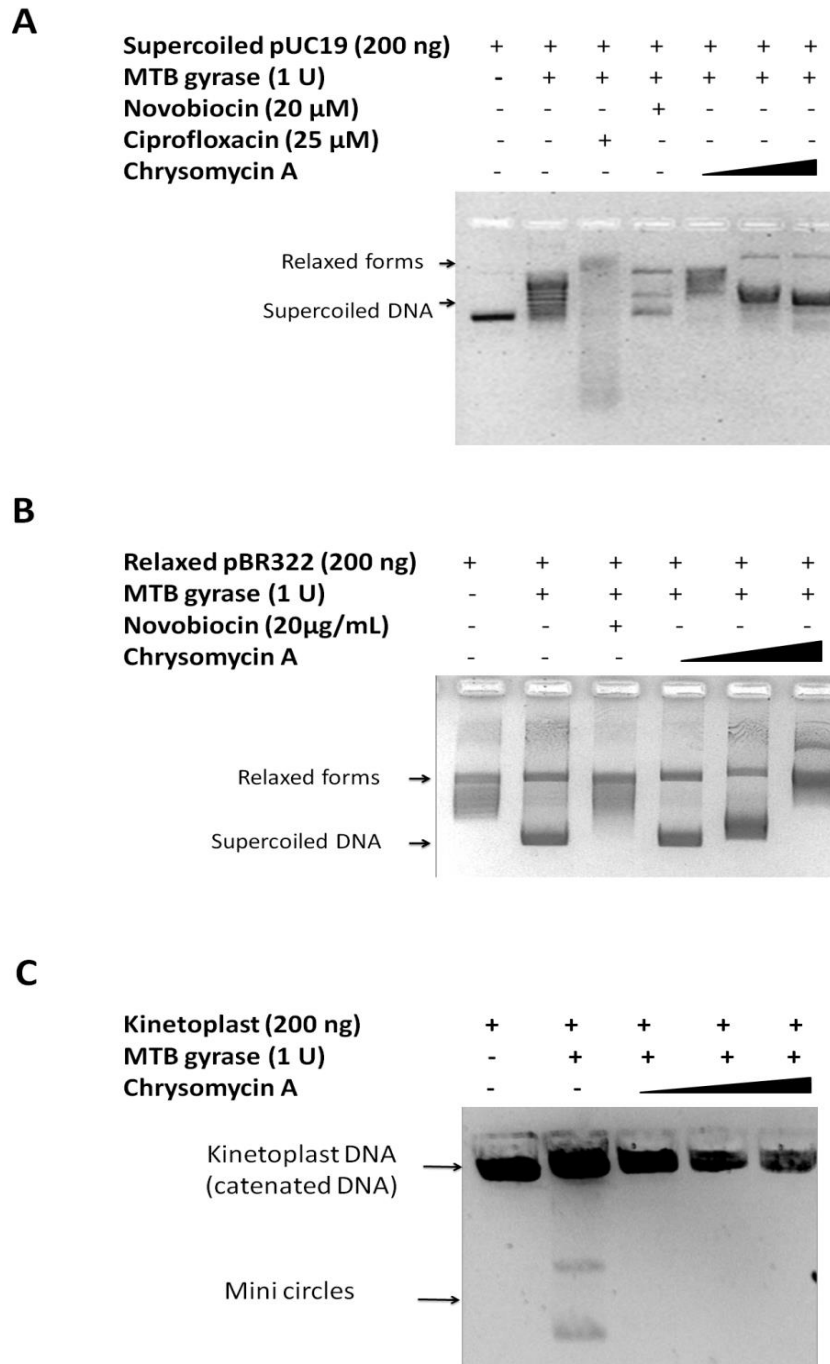

344

345 **Figure 5:** Gyrase inhibition assay. A - DNA relaxation assay. B - DNA supercoiling assay. C -

346 Decatenation assay.

347 **Table 1:** Antimicrobial activity of chrysomycin A against drug resistant clinical strains of *M.*  
 348 *tuberculosis*.

| Strain* | Resistant to            | Susceptible to         | MIC( $\mu\text{g/ml}$ ) |
|---------|-------------------------|------------------------|-------------------------|
| 1       | INH, RMP, Km, LFX       | No data                | 4                       |
| 2       | INH, RMP, LFX           | Km                     | 2                       |
| 3       | INH, RMP, LFX           | Km                     | 4                       |
| 4       | INH, RMP, LFX           | Km                     | 1                       |
| 5       | INH, RMP, LFX           | Km                     | 1                       |
| 6       | INH, RMP, Km            | LFX                    | 2                       |
| 7       | INH, RMP, EMB, M, Ofx   | Km, Ak, M              | 8                       |
| 8       | INH, Ofx                | RMP, Km                | 16                      |
| 9       | INH, RMP, EMB, M, Ofx   | Km,Ak, M               | 8                       |
| 10      | INH                     | RMP, Km,Ofx            | 16                      |
| 11      | RMP                     | INH, EMB,Km,Ak, M, Ofx | 1                       |
| 12      | INH, RMP,Ofx            | EMB,Km,Ak, M           | 16                      |
| 13      | RMP, Km                 | INH, EMB, Ofx, Ak, M   | 8                       |
| 14      | STR, INH, RMP, EMB, Ofx | Km                     | 1                       |
| 15      | INH, RMP, EMB, Ofx      | Km, Ak, M, Ofx         | 16                      |
| 16      | STR,INH, RMP            | EMB,Km,Ofx             | 16                      |
| 17      | STR,INH, RMP, EMB,      | Km, Ofx                | 2                       |
| 18      | INH                     | RMP, EMB,Km,Ofx,Ak, M  | 4                       |

---

|       |                   |              |   |
|-------|-------------------|--------------|---|
| 19    | INH, RMP, Km, LFX | STR, EMB, Ak | 4 |
| 20    | INH, RMP, Km,     | STR, LFX     | 2 |
| H37Rv | -                 |              | 4 |

---

349 INH – Isoniazid, RMP – Rifampicin, EMB – Ethambutol, Ofx – Ofloxacin, LFX – Levofloxacin,  
350 STR – Streptomycin, Km – Kanamycin, M – Moxifloxacin, Ak – Amikacin.

351 \* - identity of the clinical isolates withheld.

## 352 **Conclusion**

353 Chrysomycin A inhibits most of the drug resistant clinical strains of *M. tuberculosis* and acts in  
354 synergy with ethambutol, the first line drug and ciprofloxacin, the second line drug.  
355 Chrysomycin A inhibits the activity of topoisomerase I and gyrase enzymes of *M. tuberculosis* to  
356 kill the bacterium. The inhibition activity was either by binding to the primase domain of the  
357 topoisomerase I, or by binding to specific nucleotide sequences of DNA which are apparently the  
358 recognition and binding sites of the topoisomerase I, thereby preventing the enzyme activity.

## 359 **Acknowledgement:**

360 BM thanks Council of Scientific Industrial Research, Govt. of India for research fellowship, and  
361 RAK thanks Department of Biotechnology, Govt. of India for funding. We are grateful to Ms.  
362 Arthi R and Dr. Kana M Sureshan, School of Chemistry, Indian Institutes of Science Education  
363 and Research, Thiruvananthapuram, for their help in fluorescence spectrometry and circular  
364 dichroism studies.

365 **Funding:** This study was conducted as part of our routine work and was supported by intramural  
366 funding.

367 **Conflict of interests:** The authors declare no conflict of interests.

## 368 **References**

369 1. Strelitz F, Flon H, Asheshov INJJob. Chrysomycin: a new antibiotic substance for  
370 bacterial viruses. 1955; **69**: 280.

- 371 2. Jain SK, Pathania AS, Parshad R et al. Chrysomycins A–C, antileukemic  
372 naphthocoumarins from *Streptomyces sporoverrucosus*. *RSC advances* 2013; **3**: 21046-53.
- 373 3. MATSON JA, ROSE WC, BUSH JA et al. Antitumor activity of chrysomycins M and V.  
374 *The Journal of antibiotics* 1989; **42**: 1446-8.
- 375 4. Weiss U, Yoshihira K, Highet R et al. The Chemistry of the Antibiotics Chrysomycin A  
376 and B Antitumor Activity of Chrysomycin A. *The Journal of antibiotics* 1982; **35**: 1194-201.
- 377 5. Wada S-i, Sawa R, Iwanami F et al. Structures and biological activities of novel 4'-  
378 acetylated analogs of chrysomycins A and B. 2017; **70**: 1078-82.
- 379 6. Muralikrishnan B, Dan VM, Vinodh J et al. Anti-microbial activity of chrysomycin A  
380 produced by *Streptomyces* sp. against *Mycobacterium tuberculosis*. 2017; **7**: 36335-9.
- 381 7. Wu F, Zhang J, Song F et al. Chrysomycin A derivatives for the treatment of multi-drug-  
382 resistant tuberculosis. 2020; **6**: 928-38.
- 383 8. Greenstein M, Monji T, Yeung R et al. Light-dependent activity of the antitumor  
384 antibiotics ravidomycin and desacetylavidomycin. *Antimicrobial agents and chemotherapy*  
385 1986; **29**: 861-6.
- 386 9. Wei TT, BYRNE KM, WARNICK-PICKLE D et al. Studies on the mechanism of action  
387 of gilvocarcin V and chrysomycin A. *The Journal of antibiotics* 1982; **35**: 545-8.
- 388 10. Caleffi-Ferracioli KR, Maltempe FG, Siqueira VLD et al. Fast detection of drug  
389 interaction in *Mycobacterium tuberculosis* by a checkerboard resazurin method. *Tuberculosis*  
390 2013; **93**: 660-3.
- 391 11. Palomino J-C, Martin A, Camacho M et al. Resazurin microtiter assay plate: simple and  
392 inexpensive method for detection of drug resistance in *Mycobacterium tuberculosis*.  
393 *Antimicrobial agents and chemotherapy* 2002; **46**: 2720-2.
- 394 12. Rehman SU, Sarwar T, Husain MA et al. Studying non-covalent drug–DNA interactions.  
395 *Archives of biochemistry and biophysics* 2015; **576**: 49-60.
- 396 13. Husain MA, Ishqi HM, Sarwar T et al. Interaction of indomethacin with calf thymus  
397 DNA: a multi-spectroscopic, thermodynamic and molecular modelling approach.  
398 *MedChemComm* 2017; **8**: 1283-96.
- 399 14. Sadeghi M, Bayat M, Cheraghi S et al. Binding studies of the anti-retroviral drug,  
400 efavirenz to calf thymus DNA using spectroscopic and voltammetric techniques. *Luminescence*  
401 2016; **31**: 108-17.
- 402 15. Chang Y-M, Chen CK-M, Hou M-H. Conformational changes in DNA upon ligand  
403 binding monitored by circular dichroism. *International journal of molecular sciences* 2012; **13**:  
404 3394-413.
- 405 16. Hampshire AJ, Fox KR. The effects of local DNA sequence on the interaction of ligands  
406 with their preferred binding sites. *Biochimie* 2008; **90**: 988-98.
- 407 17. Zhu C, Liu Y, Hu L et al. Molecular mechanism of the synergistic activity of ethambutol  
408 and isoniazid against *Mycobacterium tuberculosis*. *Journal of Biological Chemistry* 2018; **293**:  
409 16741-50.
- 410 18. Zhang Y, Scorpio A, Nikaido H et al. Role of acid pH and deficient efflux of pyrazinoic  
411 acid in unique susceptibility of *Mycobacterium tuberculosis* to pyrazinamide. *Journal of*  
412 *bacteriology* 1999; **181**: 2044-9.
- 413 19. Sirajuddin M, Ali S, Badshah A. Drug–DNA interactions and their study by UV–Visible,  
414 fluorescence spectroscopies and cyclic voltametry. *Journal of Photochemistry and Photobiology*  
415 *B: Biology* 2013; **124**: 1-19.

- 416 20. Kypr J, Kejnovská I, Renčiuk D et al. Circular dichroism and conformational  
417 polymorphism of DNA. *Nucleic acids research* 2009; **37**: 1713-25.
- 418 21. Sikder D, Nagaraja V. Determination of the recognition sequence of Mycobacterium  
419 smegmatis topoisomerase I on mycobacterial genomic sequences. *Nucleic acids research* 2000;  
420 **28**: 1830-7.
- 421 22. Van Dyke MW, Hertzberg RP, Dervan PB. Map of distamycin, netropsin, and  
422 actinomycin binding sites on heterogeneous DNA: DNA cleavage-inhibition patterns with  
423 methidiumpropyl-EDTA. Fe (II). *Proceedings of the National Academy of Sciences* 1982; **79**:  
424 5470-4.
- 425 23. Trask D, Muller M. Stabilization of type I topoisomerase-DNA covalent complexes by  
426 actinomycin D. *Proceedings of the National Academy of Sciences* 1988; **85**: 1417-21.
- 427 24. Ahmed W, Menon S, Godbole AA et al. Conditional silencing of topoisomerase I gene of  
428 Mycobacterium tuberculosis validates its essentiality for cell survival. *FEMS microbiology*  
429 *letters* 2014; **353**: 116-23.
- 430 25. Arjomandzadegan M, Sadrnia M, Titov L et al. Transmission Electron Microscopy of  
431 XDR Mycobacterium tuberculosis Isolates Grown on High Dose of Ofloxacin. *Scientia*  
432 *pharmaceutica* 2017; **85**: 3.
- 433 26. Godbole AA, Ahmed W, Bhat RS et al. Targeting Mycobacterium tuberculosis  
434 topoisomerase I by small-molecule inhibitors. *Antimicrobial agents and chemotherapy* 2015; **59**:  
435 1549-57.

436

437
